# Supplementary material for: Induction of Pluripotency in Adult Equine Fibroblasts without c-MYC
Source: PubMed Central journal article supplement (PMC3328202; doi:10.1155/2012/429160), 2012-03-19

Figure - 1

A

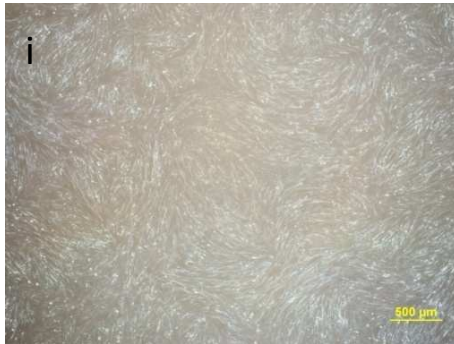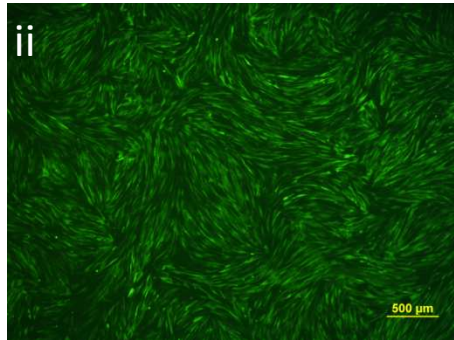

B

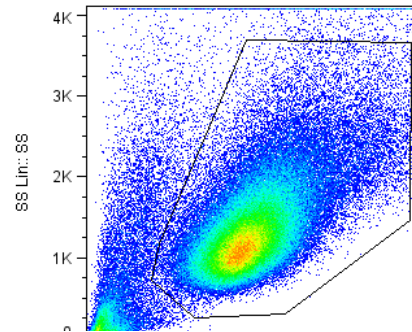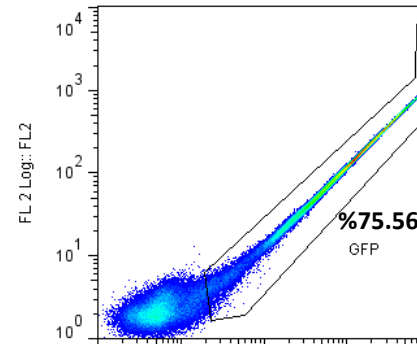

C

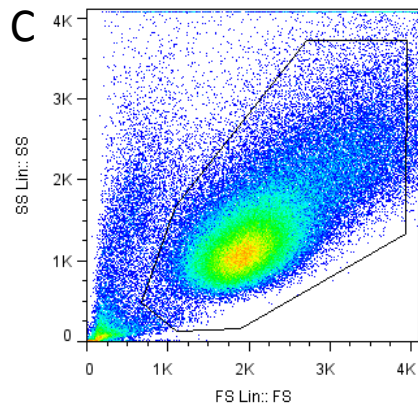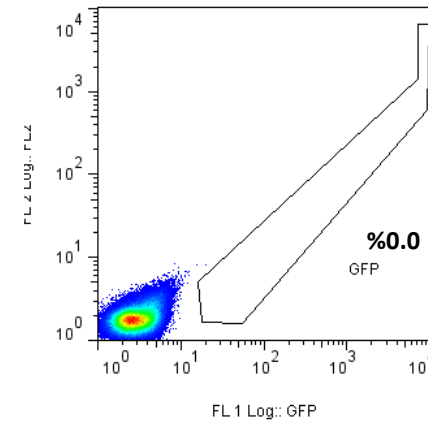

Figure - 2

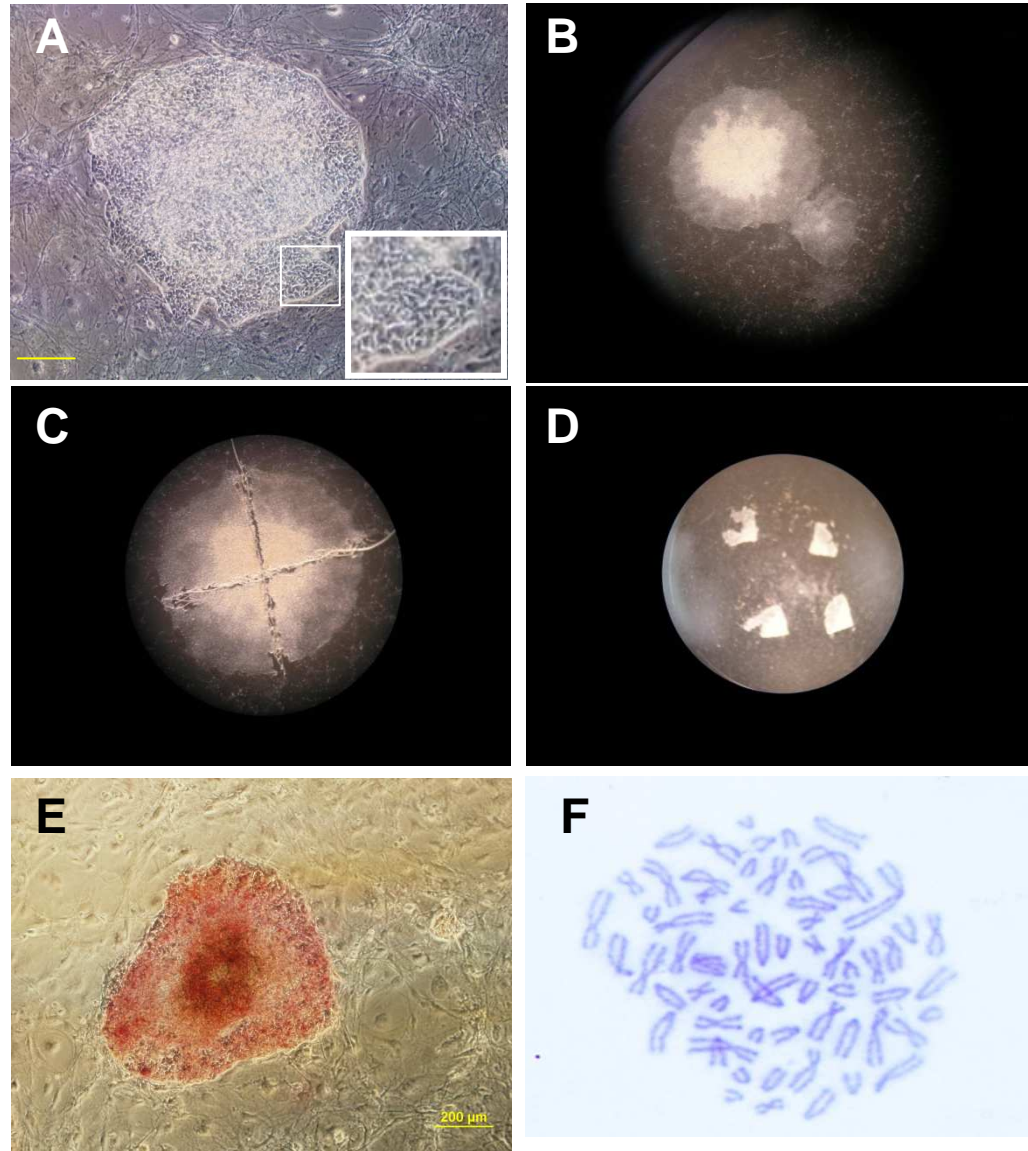

Figure - 3

**A**

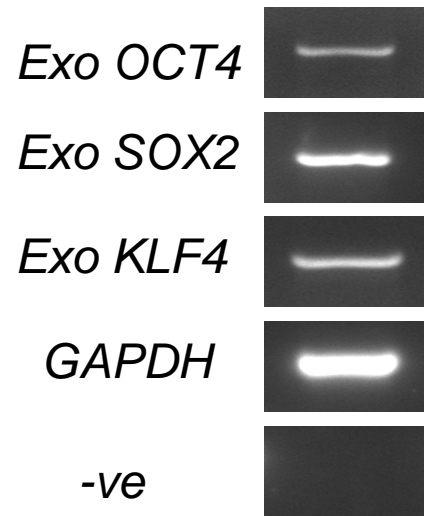

**B**

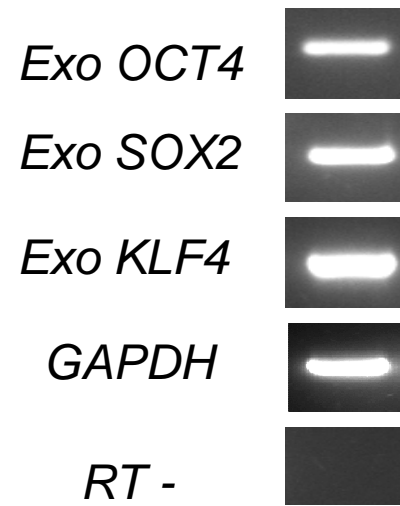

**C**

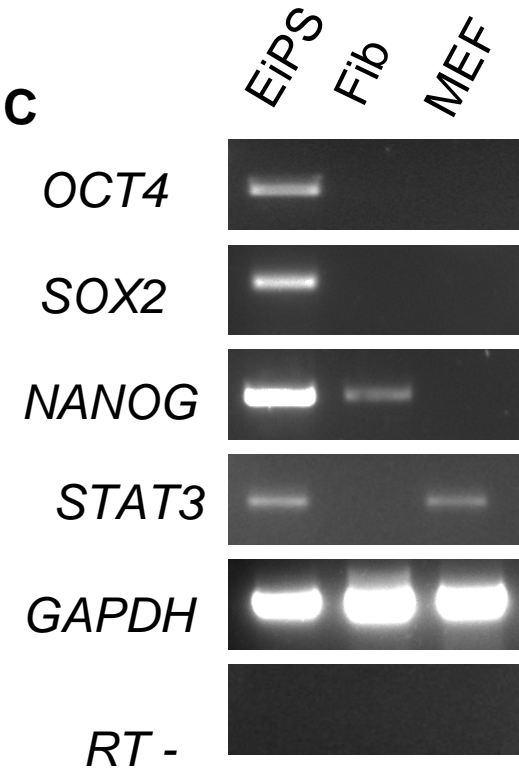

Figure - 4

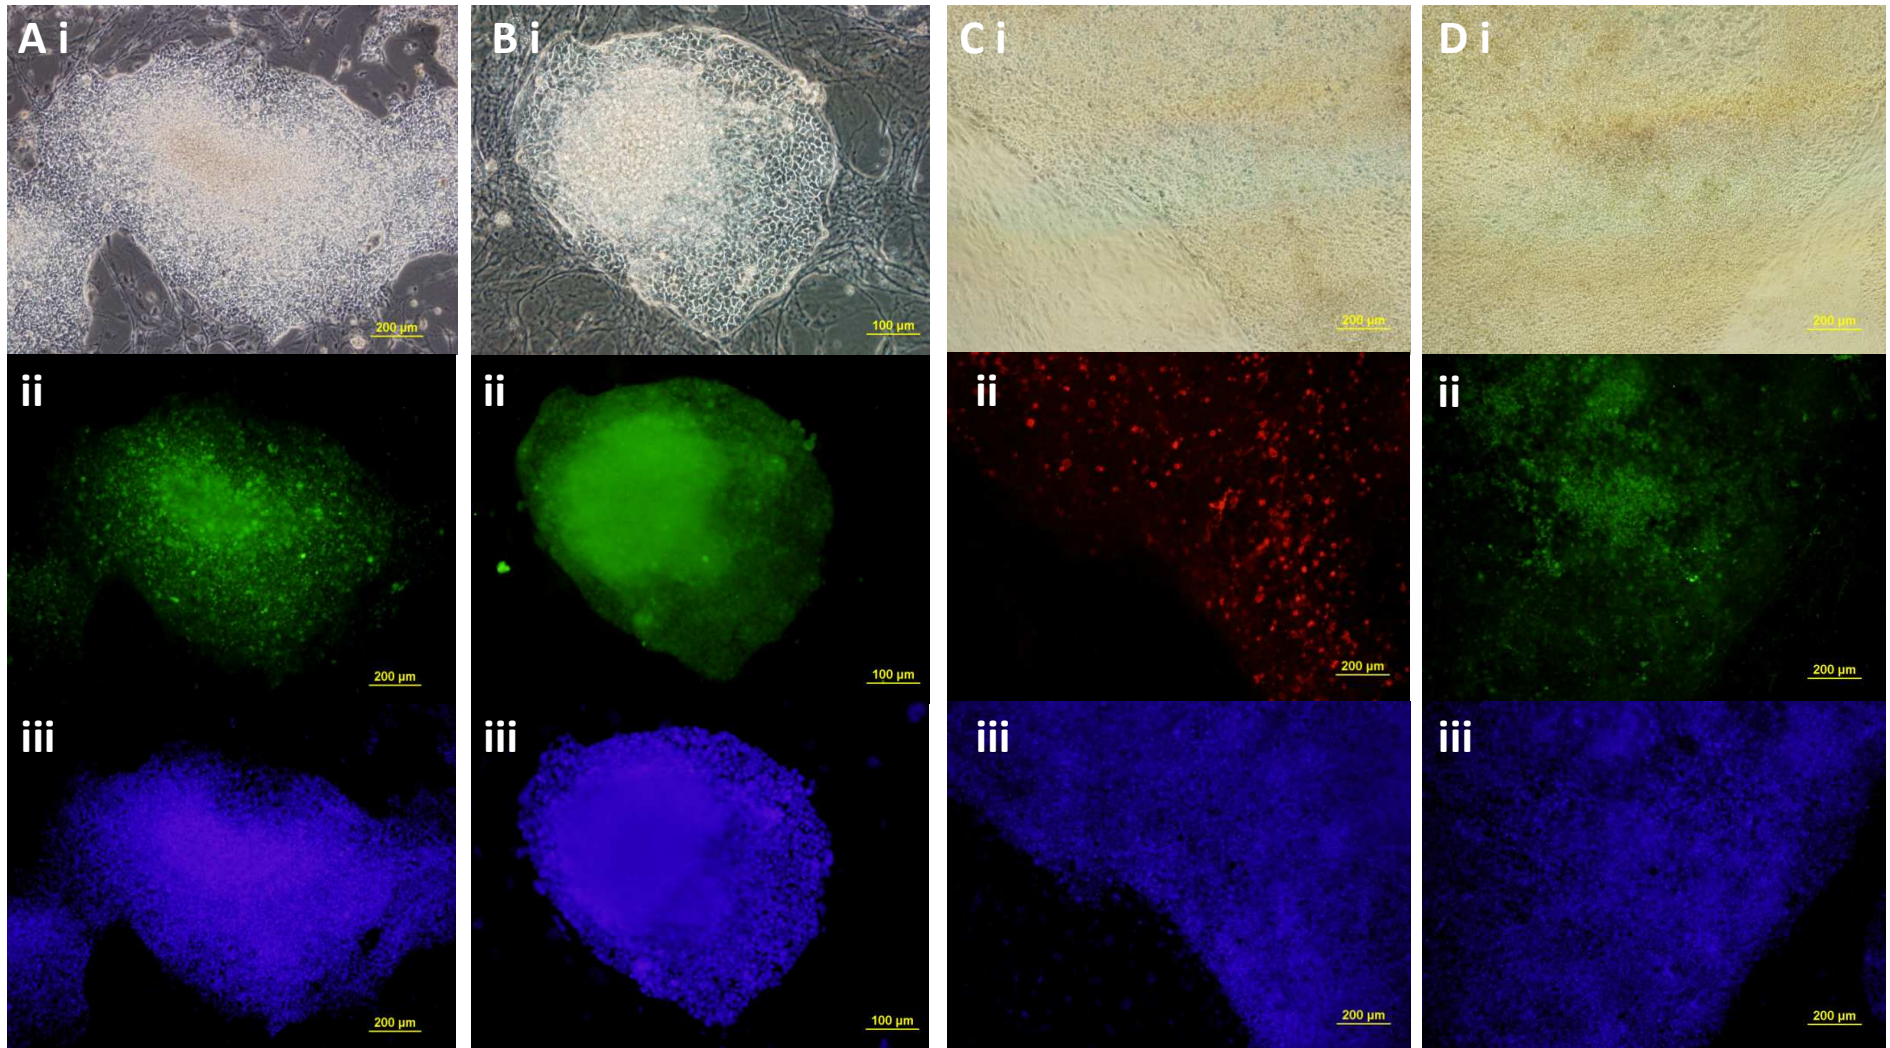

Figure - 5

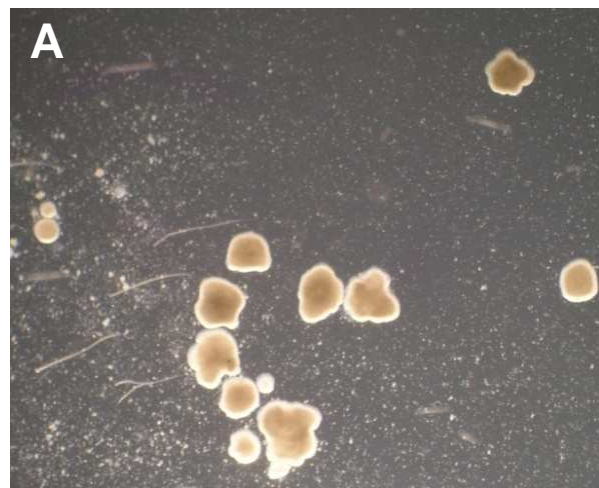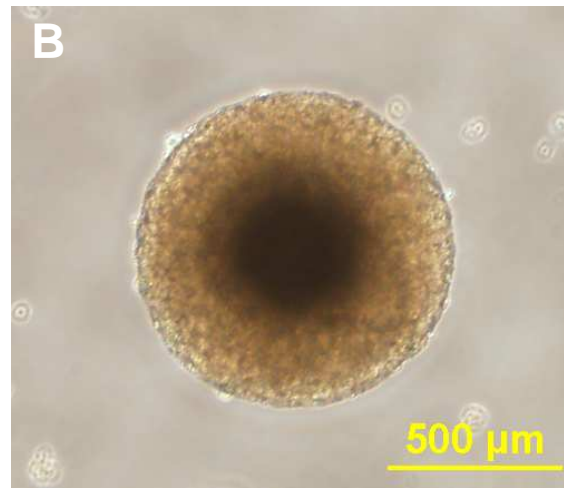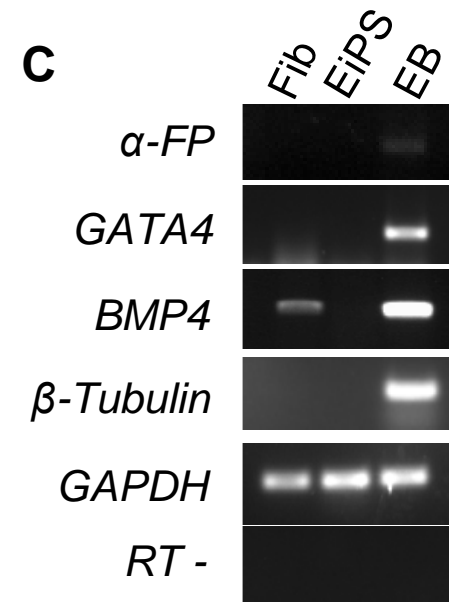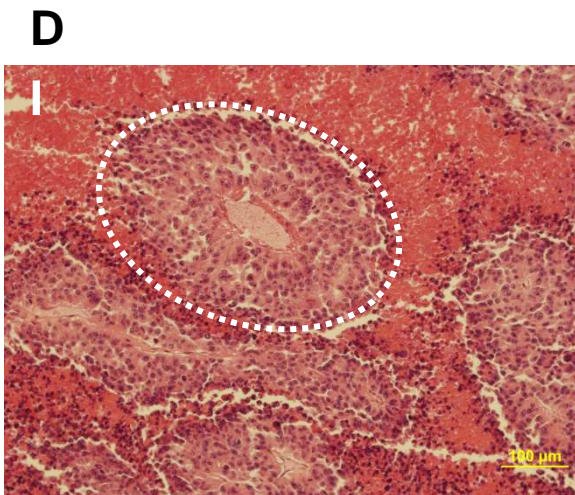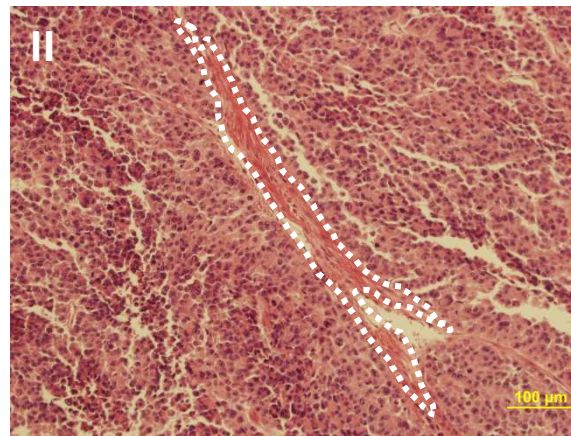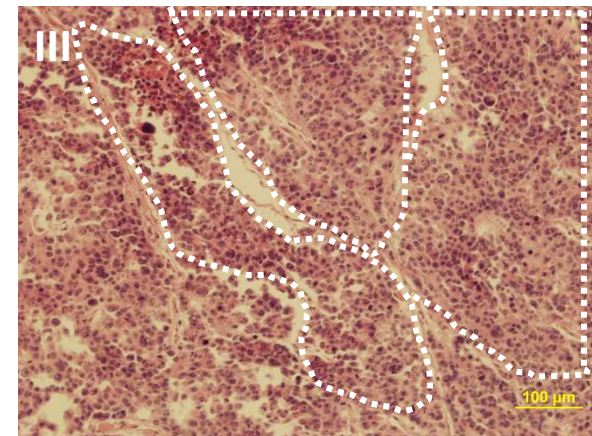

# Supplemental Figure 1

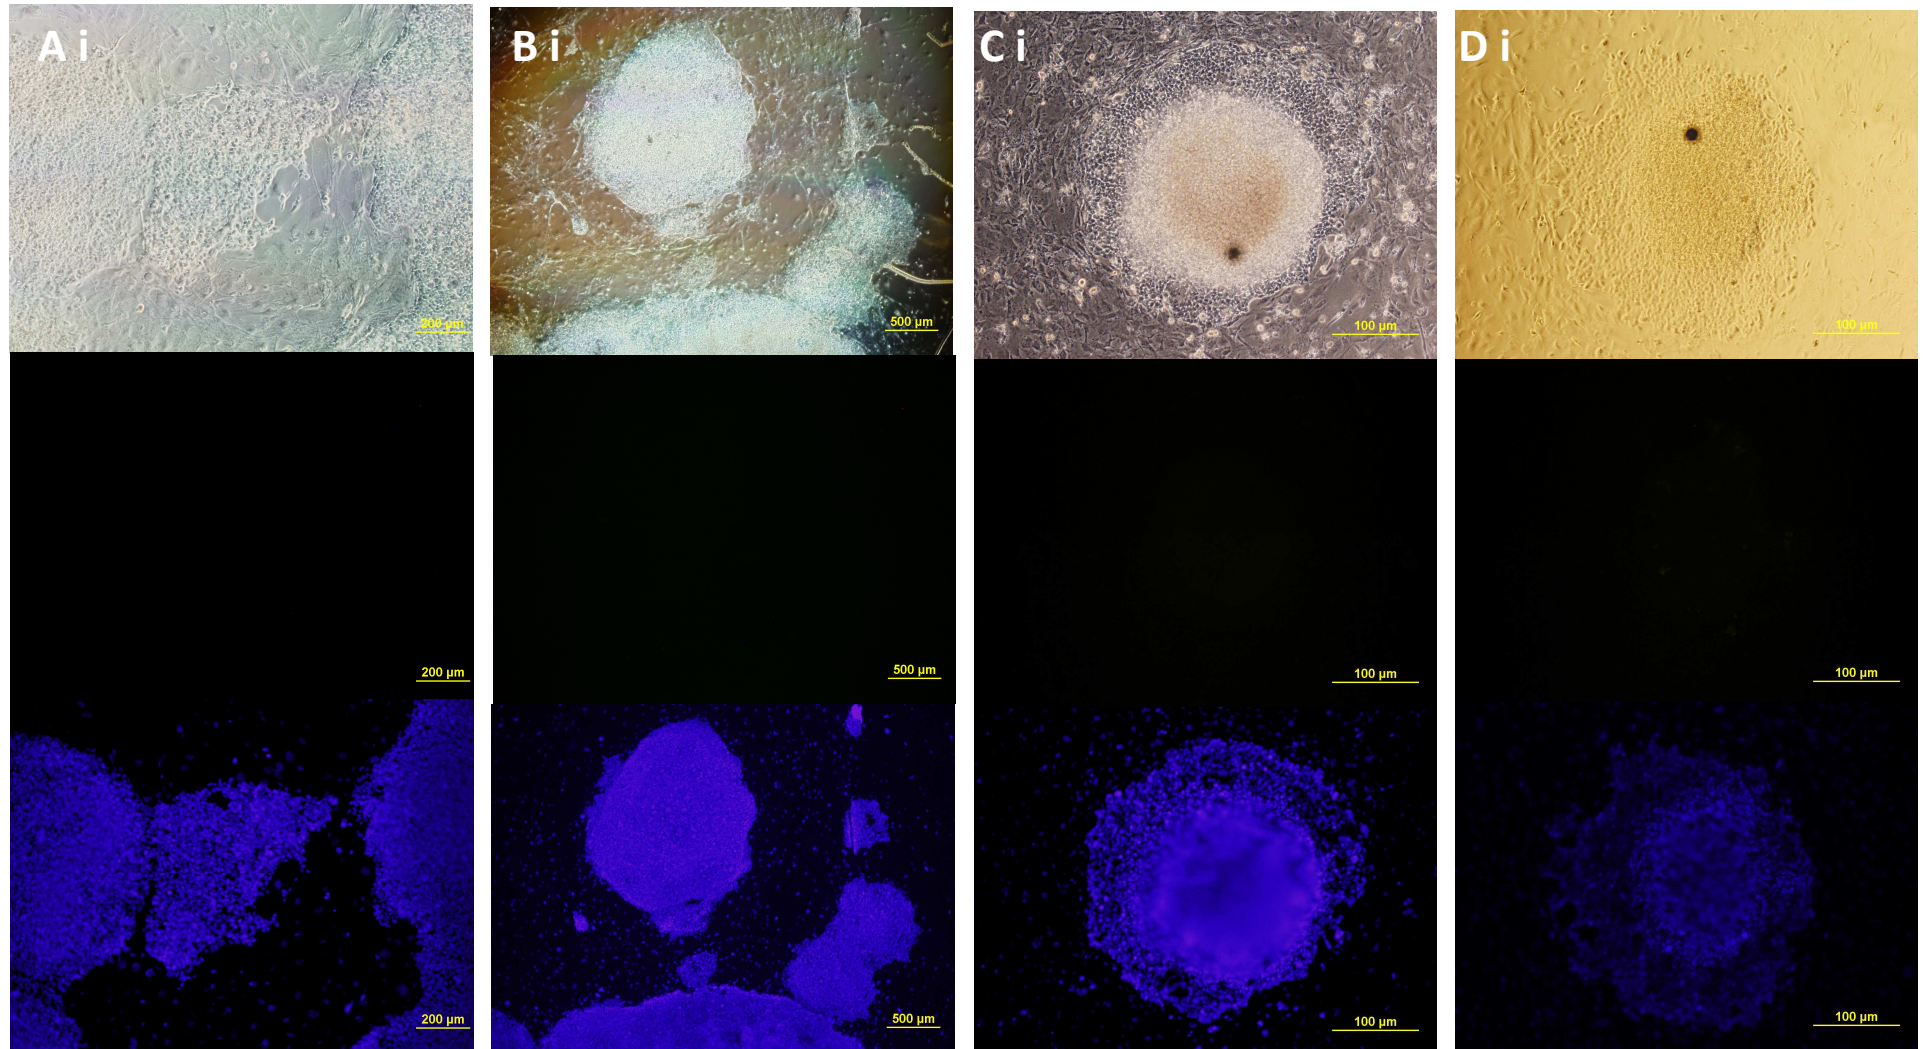

Supplemental Figure 2

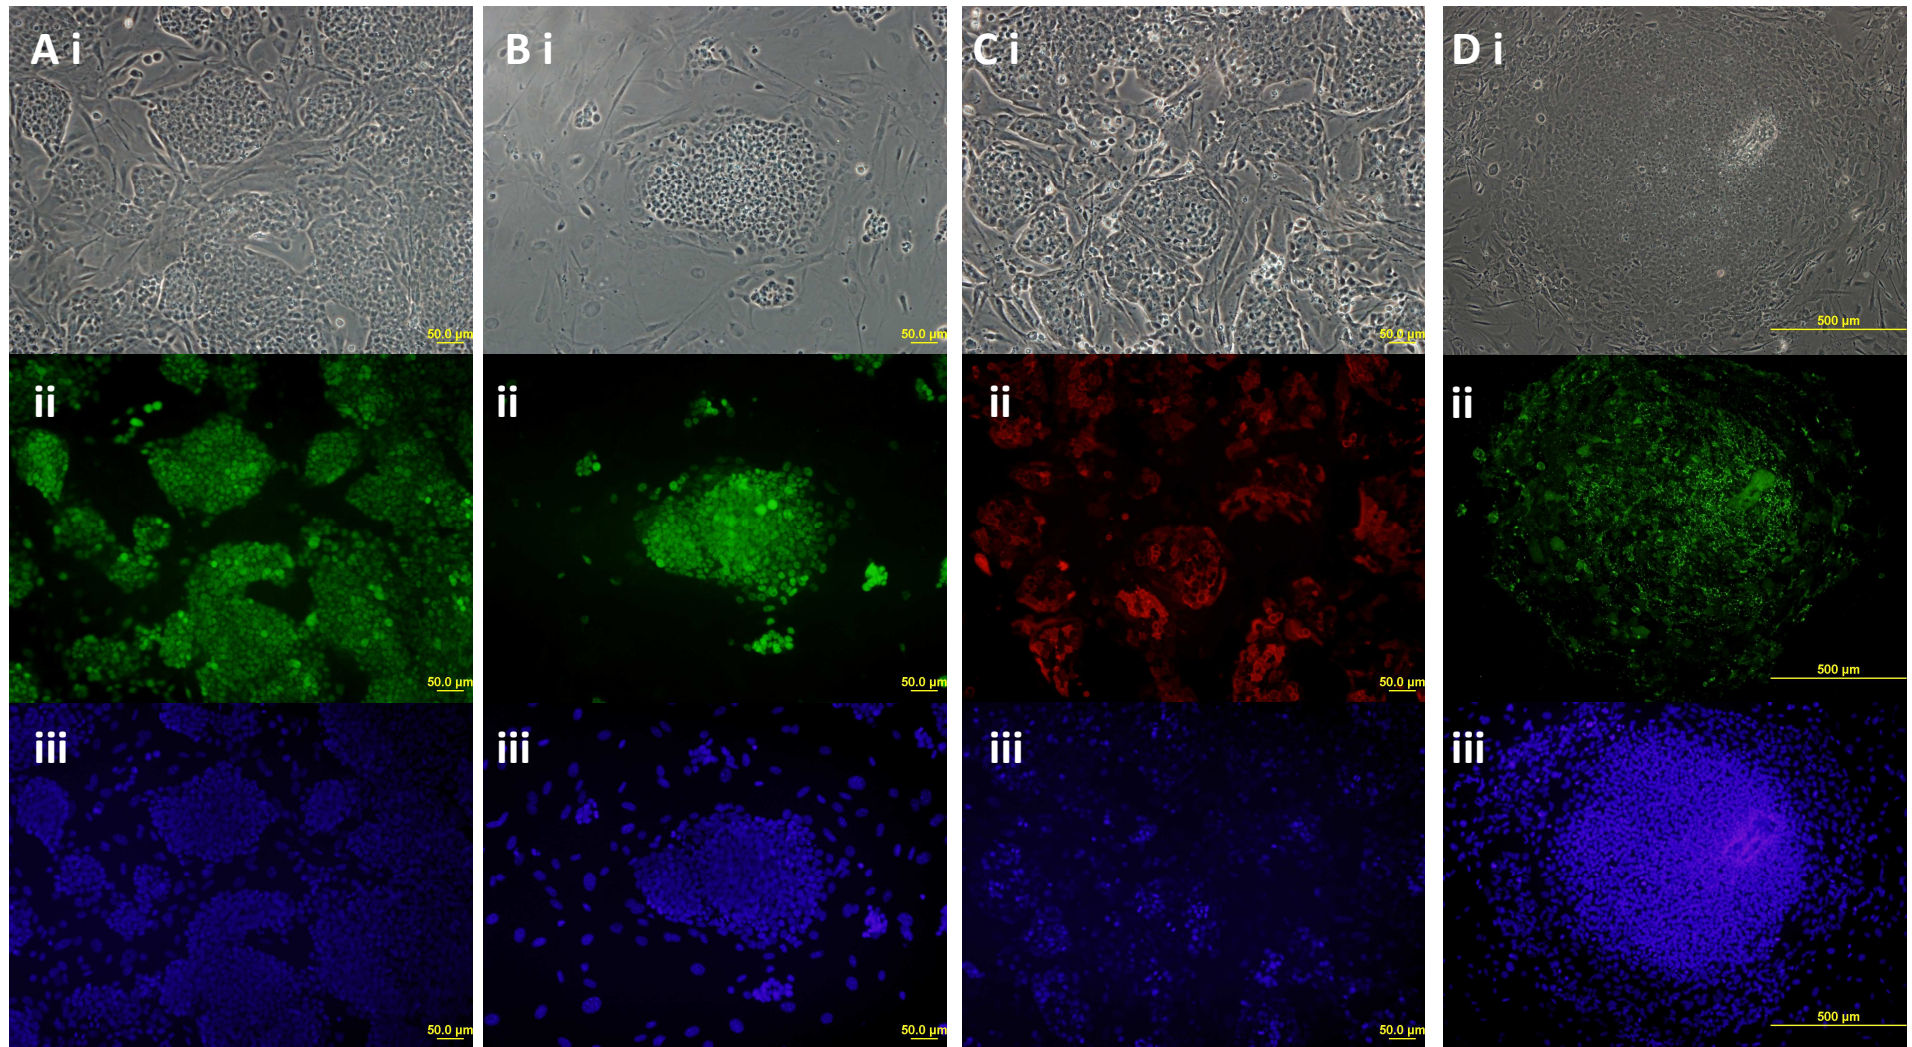

Supplement: 429160.f1.pdf [file 429160.f1.pdf]
